# Supplementary material for: Efficacy of prehospital administration of fibrinogen concentrate in trauma patients bleeding or presumed to bleed (FIinTIC): A multicentre, double-blind, placebo-controlled, randomised pilot study
Source: PubMed Central journal article supplement — Eur J Anaesthesiol. 2020 Oct 28;38(4):348–57. doi: 10.1097/EJA.0000000000001366 (PMC7969176; doi:10.1097/eja.0000000000001366), 2020-10-28
Supplement: ejanet-38-348-s001.pdf [file ejanet-38-348-s001.pdf]

## **Appendix 2. FINTIC Study Group.**

### **Investigator list**

A. Prof. Dr. Dietmar Fries  
Medical University Innsbruck  
Department of General and Surgical Critical Care Medicine  
Anichstrasse 35, A-6020 Innsbruck  
Austria

Dr. Elgar Oswald  
Medical University Innsbruck  
Department of General and Surgical Critical Care Medicine  
Anichstrasse 35, A-6020 Innsbruck  
Austria

Dr. Petra Innerhofer  
Medical University Innsbruck  
Department of Anaesthesiology and Critical Care Medicine  
Anichstrasse 35, A-6020 Innsbruck  
Austria

Dr. Benjamin Treichl  
Medical University Innsbruck  
Department of Anaesthesiology and Critical Care Medicine  
Anichstrasse 35, A-6020 Innsbruck  
Austria

OA Dr. Herbert Schöchl  
AUVA Trauma Center / Emergency Hospital Salzburg  
Department for Anesthesia and Intensive Care Medicine  
Dr. Franz Rehr-Platz 5, A-5020 Salzburg  
Austria

A.o. Univ.Prof. Dr. W.G. Voelckel, M.Sc.  
AUVA Trauma Center / Emergency Hospital Salzburg  
Department for Anesthesia and Intensive Care Medicine  
Dr. Franz Rehr-Platz 5, A-5020 Salzburg  
Austria

Prim. Mag. Dr. Günther Sumann  
Regional Hospital Vöcklabruck  
Clinical Department for Anesthesia and Intensive Care Medicine  
Dr.-Wilhelm-Bock-Strasse 1; A-4840 Vöcklabruck  
Austria  
and  
NAW Vöcklabruck  
Dr.-Wilhelm-Bock-Str. 1a, A-4840 Vöcklabruck  
Austria

Dr. Jürgen Simharl  
Regional Hospital Vöcklabruck  
Clinical Department for Anesthesia and Intensive Care Medicine  
Dr.-Wilhelm-Bock-Strasse 1; A-4840 Vöcklabruck  
Austria

Dr. Ivana Zýková  
Regional Hospital Liberec  
Department of Anesthesiology and Intensive Care Medicine  
Husova 10, CZ-46063 Liberec  
Czech Republic

Dr. Pavel Sedlák  
Regional Hospital Liberec  
Department of Anesthesiology and Intensive Care Medicine  
Husova 10, CZ-46063 Liberec  
Czech Republic

Prof. Dr. Marc Maegele  
Cologne-Merheim Medical Center  
Department for Trauma Surgery und Orthopedics  
Ostmerheimerstr. 200, D-51109 Cologne  
Germany  
and  
HEMS Christoph 3  
Scheibenstraße 13, D-50737 Cologne  
Germany

Dr. Phillip Helm  
Cologne-Merheim Medical Center  
Department for Trauma Surgery und Orthopedics  
Ostmerheimerstr. 200, D-51109 Cologne  
Germany  
and  
HEMS Christoph 3  
Scheibenstraße 13, D-50737 Cologne  
Germany

Dr. Sigune Kaske  
Cologne-Merheim Medical Center  
Department for Trauma Surgery und Orthopedics  
Ostmerheimerstr. 200, D-51109 Cologne  
Germany  
and  
HEMS Christoph 3  
Scheibenstraße 13, D-50737 Cologne  
Germany

Dr. Michael Caspers  
Cologne-Merheim Medical Center  
Department for Trauma Surgery und Orthopedics  
Ostmerheimerstr. 200, D-51109 Cologne  
Germany  
and  
HEMS Christoph 3  
Scheibenstraße 13, D-50737 Cologne  
Germany

Dr. Nadine Schäfer  
Cologne-Merheim Medical Center  
Department for Trauma Surgery und Orthopedics  
Ostmerheimerstr. 200, D-51109 Cologne  
Germany

Julia Böhm  
Cologne-Merheim Medical Center  
Department for Trauma Surgery und Orthopedics  
Ostmerheimerstr. 200, D-51109 Cologne  
Germany

Dr. Marc Kaufmann  
HEMS Christophorus 1  
Fürstenweg 199, A-6020 Innsbruck

Austria

Priv.-Doz. Dr. Werner Tiefenthaler  
HEMS Christophorus 1  
Fürstenweg 199, A-6020 Innsbruck  
Austria

Dr. Hubert Haberfellner  
HEMS Christophorus 1  
Fürstenweg 199, A-6020 Innsbruck  
Austria

Dr. Regine Korschineck  
HEMS Christophorus 1  
Fürstenweg 199, A-6020 Innsbruck  
Austria

Priv.-Doz. Dr. Peter Paal  
HEMS Christophorus 1  
Fürstenweg 199, A-6020 Innsbruck  
Austria

Dr. Hannes Dejaco  
HEMS Christophorus 1  
Fürstenweg 199, A-6020 Innsbruck  
Austria

Dr. Wolfgang Lederer  
HEMS Christophorus 1  
Fürstenweg 199, A-6020 Innsbruck  
Austria

Dr. Bernhard Ziegler  
HEMS Christophorus 6  
Kröbenfeldstrasse 12b, A-5020 Salzburg  
Austria

Dr. Aurel Botz  
HEMS Christophorus 6  
Kröbenfeldstrasse 12b, A-5020 Salzburg  
Austria

Dr. Christian Windhofer  
HEMS Christophorus 6  
Kröbenfeldstrasse 12b, A-5020 Salzburg  
Austria

Dr. Jacob Krammer  
HEMS Christophorus 6  
Kröbenfeldstrasse 12b, A-5020 Salzburg  
Austria

Dr. Christine Wimmer  
HEMS Christophorus 14  
Niederöblarn 129, A-8960 Niederöblarn  
Austria

Dr. Reinhard Doppler  
HEMS Christophorus 14  
Niederöblarn 129, A-8960 Niederöblarn  
Austria

Dr. Birgit Jaritz  
HEMS Christophorus 14  
Niederöblarn 129, A-8960 Niederöblarn  
Austria

Dr. Gerold Muhri  
HEMS Christophorus 14  
Niederöblarn 129, A-8960 Niederöblarn  
Austria

Dr. Christian Niederwanger  
HEMS Martin 2  
Tiroler Bundesstrasse 1, A-6462 Karres  
Austria

Dr. Dietrich Frank  
HEMS Martin 2  
Tiroler Bundesstrasse 1, A-6462 Karres  
Austria

Dr. Jürgen Kaufmann  
HEMS Martin 2  
Tiroler Bundesstrasse 1, A-6462 Karres  
Austria

Dr. Andreas Niederwanger  
HEMS Martin 2  
Tiroler Bundesstrasse 1, A-6462 Karres  
Austria

Dr. Daniel Staribacher  
HEMS Martin 2  
Tiroler Bundesstrasse 1, A-6462 Karres  
Austria

Dr. Michael Baubin  
NEF Innsbruck  
Anichstraße 35, A-6020 Innsbruck  
Austria

Dr. Regina Unterpertinger  
NEF Innsbruck  
Anichstraße 35, A-6020 Innsbruck  
Austria

Dr. Daniel Oberladstätter  
NEF Innsbruck  
Anichstraße 35, A-6020 Innsbruck  
Austria

Dr. Johannes Steinmann  
NAW Vöcklabruck  
Dr.-Wilhelm-Bock-Str. 1a, A-4840 Vöcklabruck  
Austria

Dr. Manuel Maurer  
HEMS Christophorus 5  
Finais 1, A-6511 Zams

Dr. Christian Klimmer  
HEMS Christophorus 5  
Finais 1, A-6511 Zams

Dr. Suzan Trübsbach  
HEMS Christophorus 5  
Finais 1, A-6511 Zams

Dr. Ernst Toferer  
HEMS Christophorus 5  
Finais 1, A-6511 Zams

Dr. Markus Thaler  
NEF Telfs  
Marktplatz 9, A-6410 Telfs  
Austria

Dr. Kainz Hartmann  
NEF Telfs  
Marktplatz 9, A-6410 Telfs  
Austria

Dr. Carolin Nebl  
HEMS Alpin 2  
Heliport Sölden – LOIO, A-6450 Sölden  
Austria

Dr. Sevak Taslakian  
HEMS Alpin 2  
Heliport Sölden – LOIO, A-6450 Sölden  
Austria

Dr. Maximilian Schandert  
HEMS Alpin 2  
Heliport Sölden – LOIO, A-6450 Sölden  
Austria

Dr. Jan Lejsek  
HEMS Krystof 18  
Emergency Medical Services – Liberec Region  
Klášterní 954/5, CZ-46001 Liberec,  
Czech Republic

Dr. Lucie Langová  
HEMS Krystof 18  
Emergency Medical Services – Liberec Region  
Klášterní 954/5, CZ-46001 Liberec  
Czech Republic

Dr. Eva Tauchmanová  
HEMS Krystof 18  
Emergency Medical Services – Liberec Region  
Klášterní 954/5, CZ-46001 Liberec  
Czech Republic  
and  
NEF Turnov  
Husova 976/37, CZ-46001 Liberec  
Czech Republic

Dr. Arne Driessen  
HEMS Christoph 3  
Scheibenstraße 13, D-50737 Cologne  
Germany

## **Key personnel**

Pamela Schech  
Medical University Innsbruck  
Department of General and Surgical Intensive Care Medicine  
Anichstrasse 35, A-6020 Innsbruck  
Austria

Dr. Nicole Innerhofer  
Medical University Innsbruck  
Department of Anaesthesiology and Critical Care Medicine  
Anichstrasse 35, A-6020 Innsbruck  
Austria
