# Supplementary material for: Efficacy of prehospital administration of fibrinogen concentrate in trauma patients bleeding or presumed to bleed (FIinTIC): A multicentre, double-blind, placebo-controlled, randomised pilot study
Source: PubMed Central journal article supplement — Eur J Anaesthesiol. 2020 Oct 28;38(4):348–57. doi: 10.1097/EJA.0000000000001366 (PMC7969176; doi:10.1097/eja.0000000000001366), 2020-10-28
Supplement: ejanet-38-348-s002.pdf [file ejanet-38-348-s002.pdf]

## Appendix 2. Study Centers

### Study Trauma Center

#### Medical University Innsbruck

Department of General and Surgical Intensive Care Medicine

**Principal Investigator (PI) & International Coordinating Investigator:** A. Prof. Dr. Dietmar Fries

Anichstrasse 35, A-6020 Innsbruck

Austria

#### AUVA Trauma Center / Emergency Hospital Salzburg

Department for Anesthesia and Intensive Care Medicine

**Principal Investigator (PI):** OA Dr. Herbert Schöch

Dr. Franz Rehr-Platz 5, A-5020 Salzburg

Austria

#### Regional Hospital Vöcklabruck

Clinical Department for Anesthesia and Intensive Care Medicine

**Principal Investigator (PI):** Prim. Mag. Dr. Günther Sumann

Dr.-Wilhelm-Bock-Strasse 1; A-4840 Vöcklabruck

Austria

#### Hospital Liberec

ARO - Department for Anesthesiology and Intensive Care

**Principal Investigator (PI):** Dr. Ivana Zykova

Husova 10, CZ-46063 Liberec

Czech Republic

#### Cologne-Merheim Medical Center

Department for Trauma Surgery und Orthopedics

**Principal Investigator (PI):** Prof. Dr. Marc Maegele

Ostmerheimerstr. 200, D-51109 Cologne

Germany

### Helicopter Emergency Medical Service (HEMS) & Emergency Doctor's Vehicles (NEF or NAW)

|            |                                                                                                                     |            |                                                                                                                       |
|------------|---------------------------------------------------------------------------------------------------------------------|------------|-----------------------------------------------------------------------------------------------------------------------|
| <b>H01</b> | <b>HEMS Christophorus 1</b><br><b>PI:</b> Dr. Marc Kaufmann<br>Fürstenweg 199, A-6020 Innsbruck<br>Austria          | <b>H03</b> | <b>HEMS Christophorus 6</b><br><b>PI:</b> Dr. Bernhard Ziegler<br>Kröbenfeldstrasse 12b, A-5020 Salzburg<br>Austria   |
| <b>H06</b> | <b>HEMS Christophorus 14</b><br><b>PI:</b> Dr. Christine Wimmer<br>Niederöblarn 129, A-8960 Niederöblarn<br>Austria | <b>H07</b> | <b>HEMS Martin 2</b><br><b>PI:</b> Dr. Christian Niederwanger<br>Tiroler Bundesstrasse 1, A-6462 Karres<br>Austria    |
| <b>H08</b> | <b>NEF Innsbruck</b><br><b>PI:</b> Dr. Michael Baubin<br>Anichstraße 35, A-6020 Innsbruck<br>Austria                | <b>H11</b> | <b>NAW Vöcklabruck</b><br><b>PI:</b> Dr. Günther Sumann<br>Dr.-Wilhelm-Bock-Str. 1a, A-4840<br>Vöcklabruck<br>Austria |
| <b>H12</b> | <b>HEMS Christophorus 5</b><br><b>PI:</b> Dr. Manuel Maurer                                                         | <b>H13</b> | <b>NEF Telfs</b><br><b>PI:</b> Dr. Markus Thaler                                                                      |

Finais 1, A-6511 Zams  
Austria

**H14**

**HEMS Alpin 2**

**PI:** Dr. Carolin Nebl  
Heliport Sölden – LOIO, A-6450  
Sölden  
Austria

**K02**

**NEF Turnov**

**PI:** Dr. Jan Lejsek  
Husova 976/37, CZ-46001 Liberec  
Czech Republic

Marktplatz 9, A-6410 Telfs  
Austria

**K01**

**HEMS Krystof 18**

**PI:** Dr. Jan Lejsek  
Husova 976/37, CZ-46001 Liberec  
Czech Republic

**E01**

**HEMS Christoph 3**

**PI:** Prof. Dr. Marc Maegele  
Scheibenstraße 13, D-50737 Cologne  
Germany
