# Supplementary figures and images for: Efficacy of prehospital administration of fibrinogen concentrate in trauma patients bleeding or presumed to bleed (FIinTIC): A multicentre, double-blind, placebo-controlled, randomised pilot study
Source: PubMed Central journal article supplement — Eur J Anaesthesiol. 2020 Oct 28;38(4):348–57. doi: 10.1097/EJA.0000000000001366 (PMC7969176; doi:10.1097/eja.0000000000001366), 2020-10-28

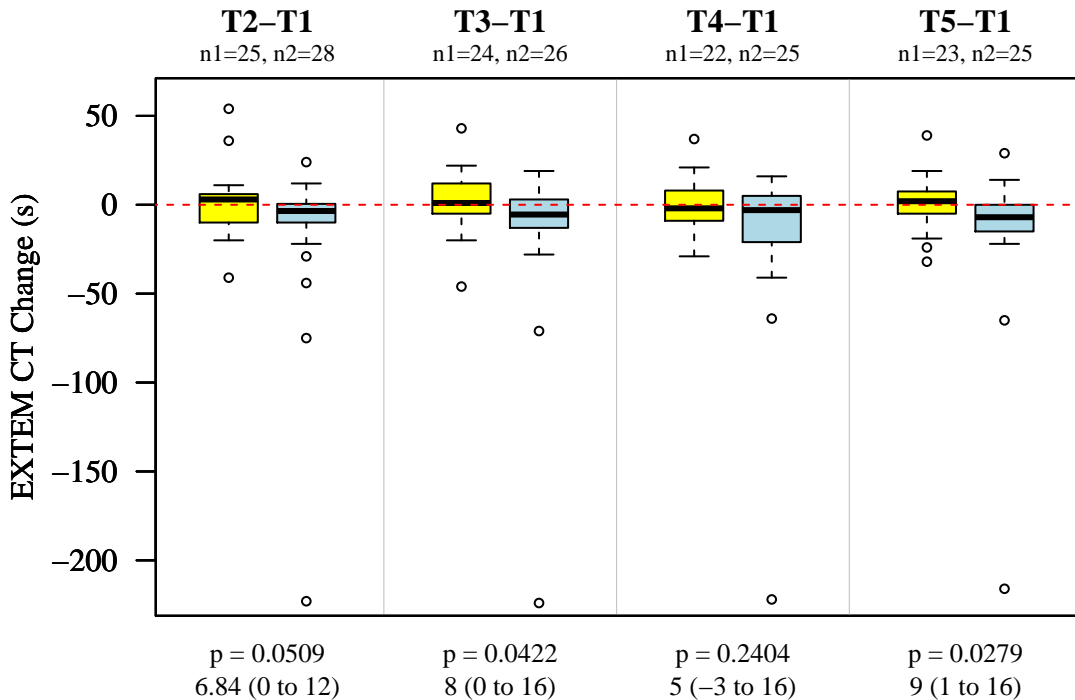

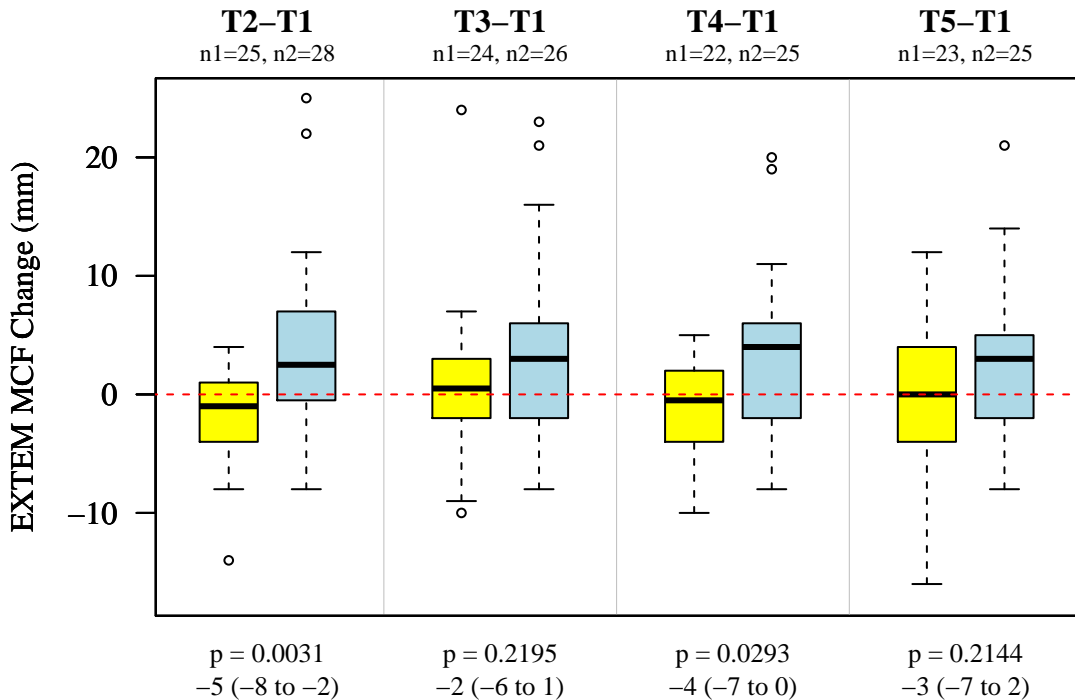

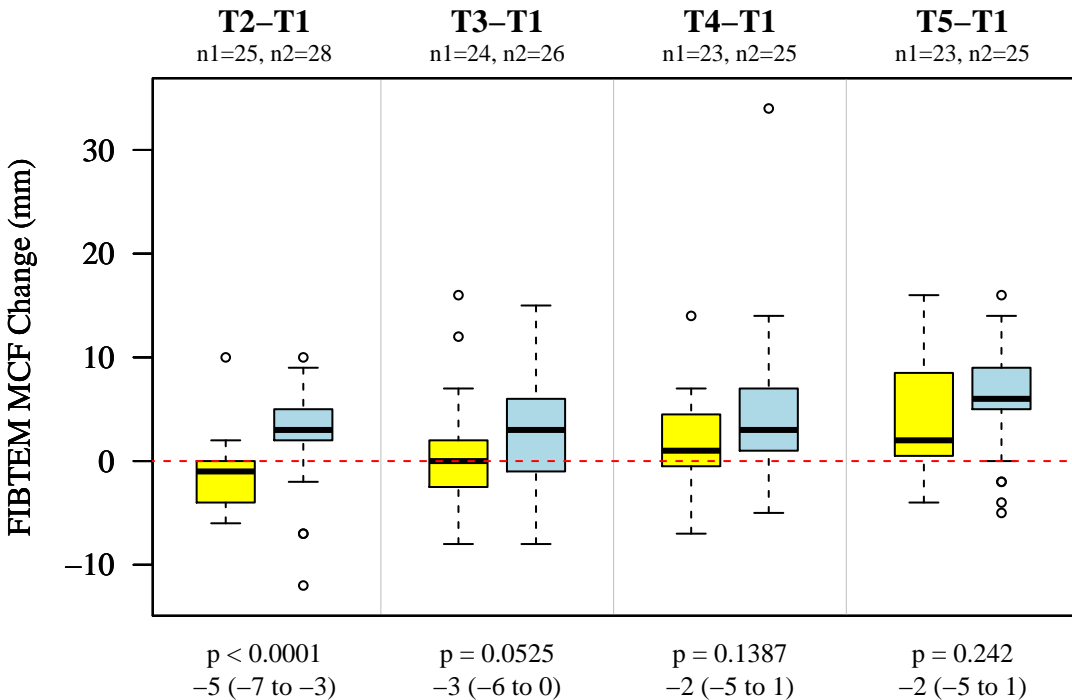

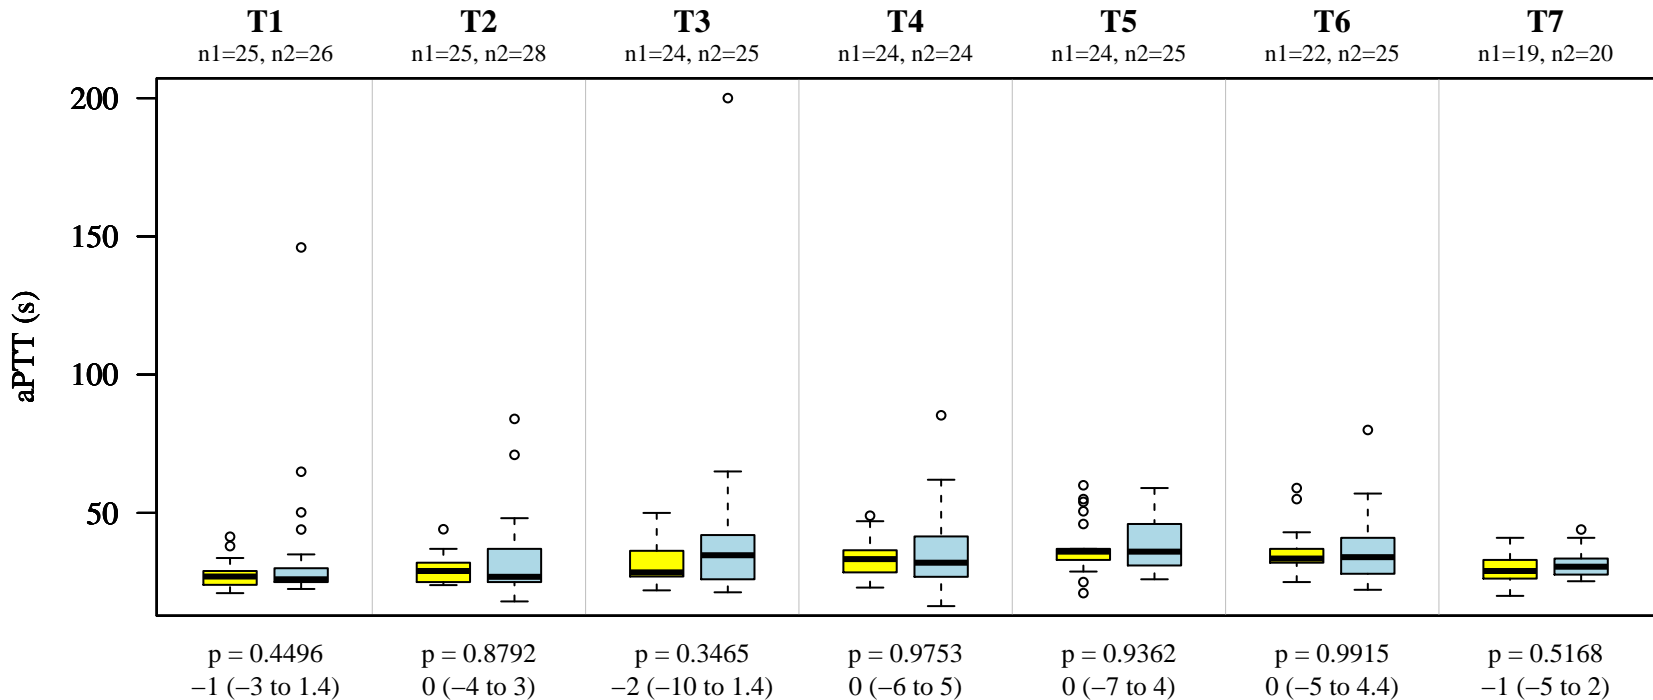

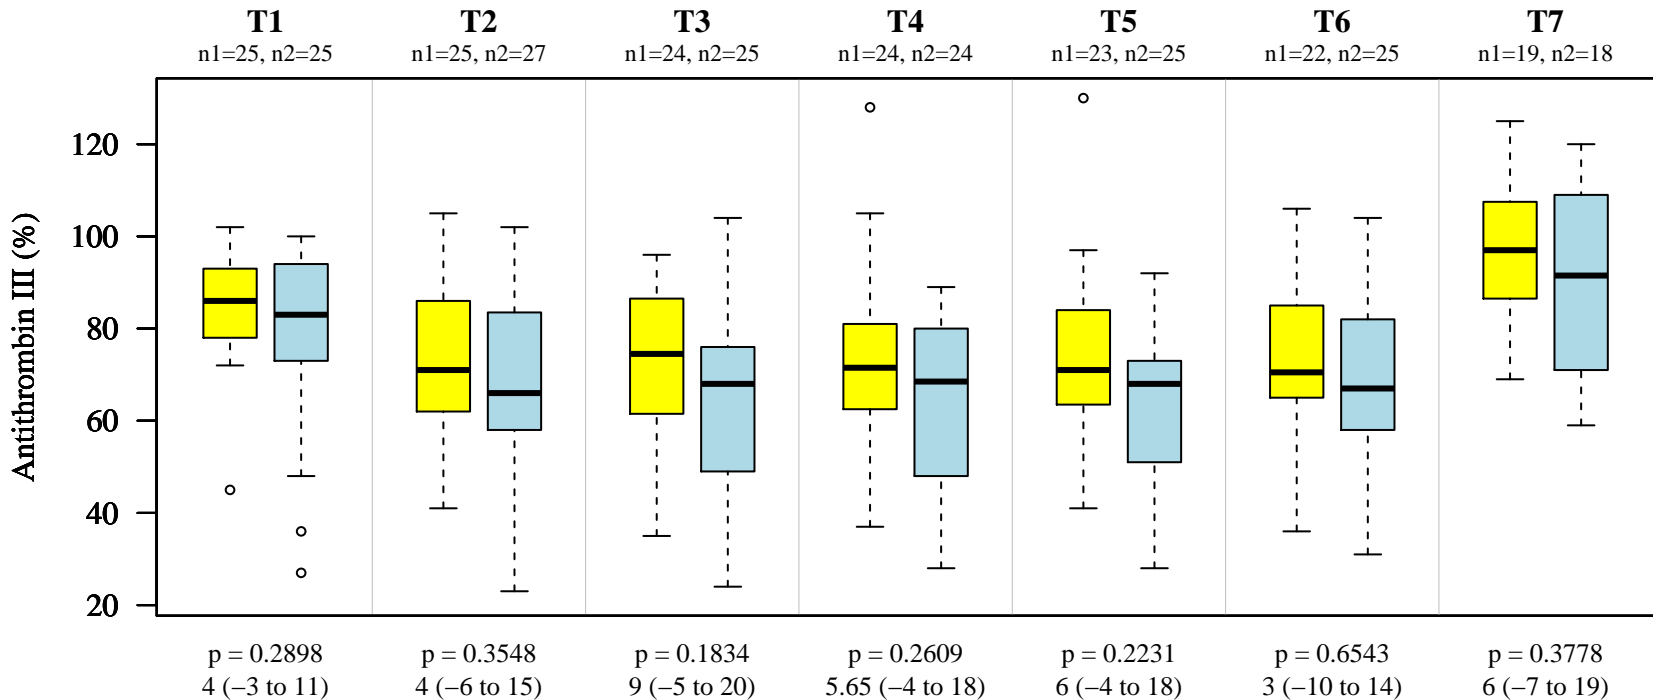

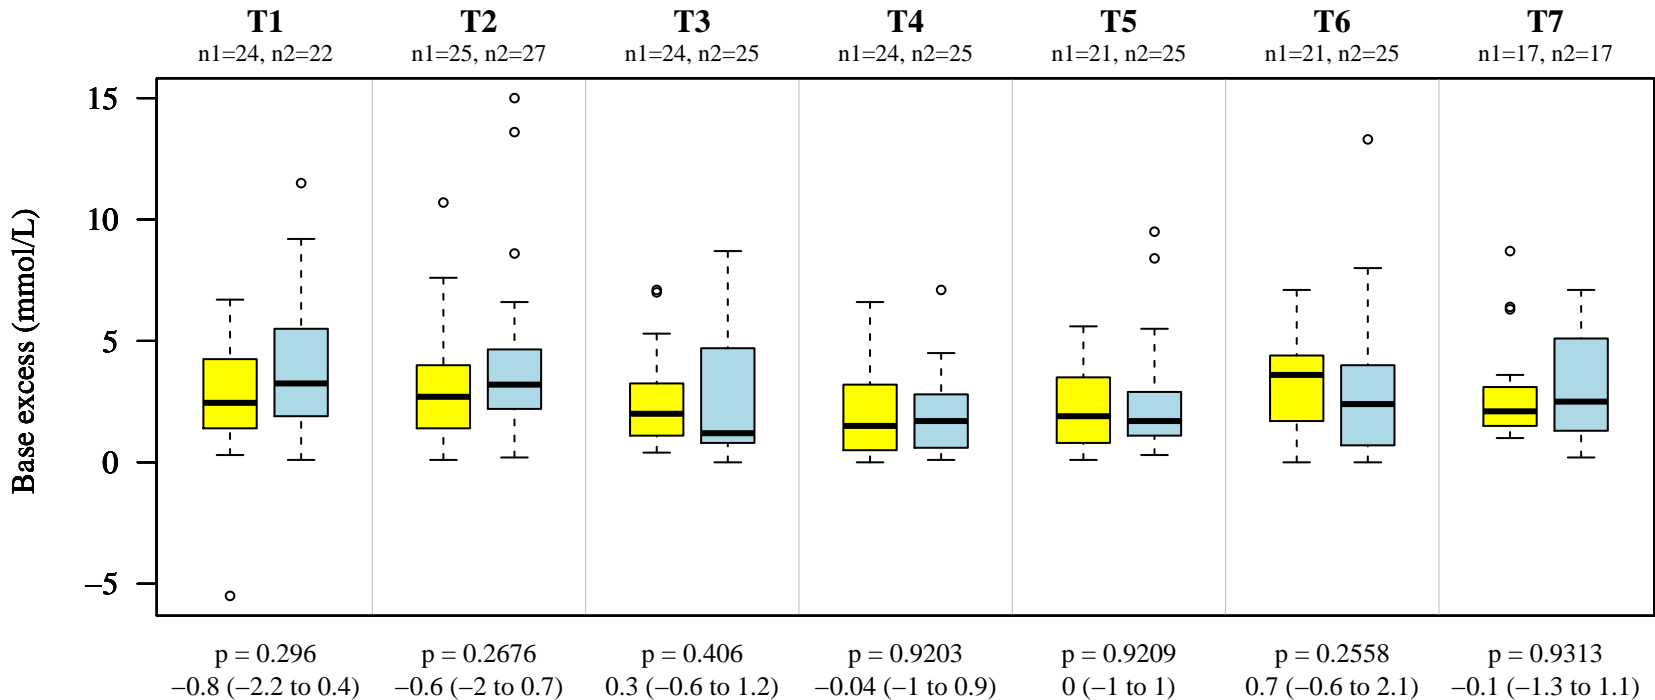

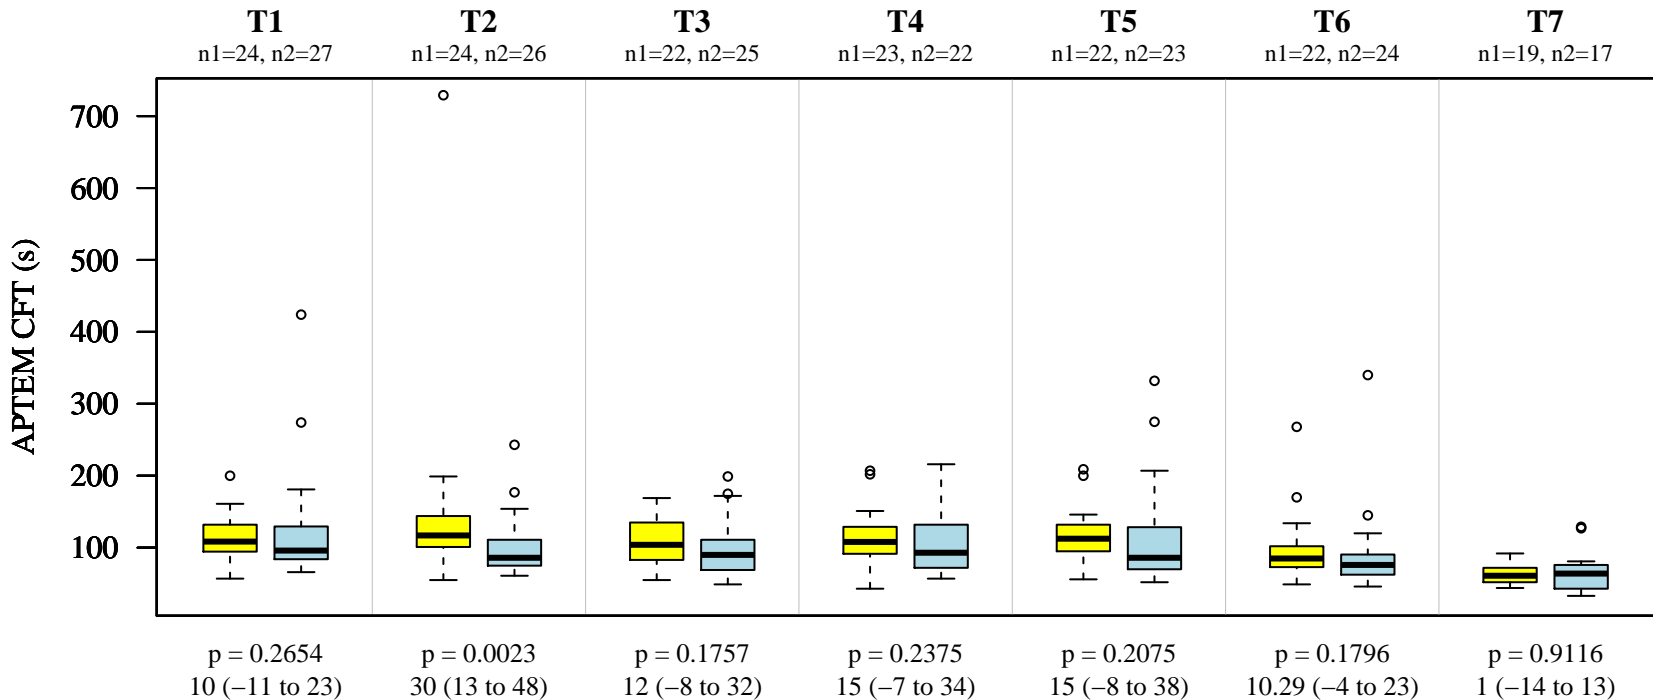

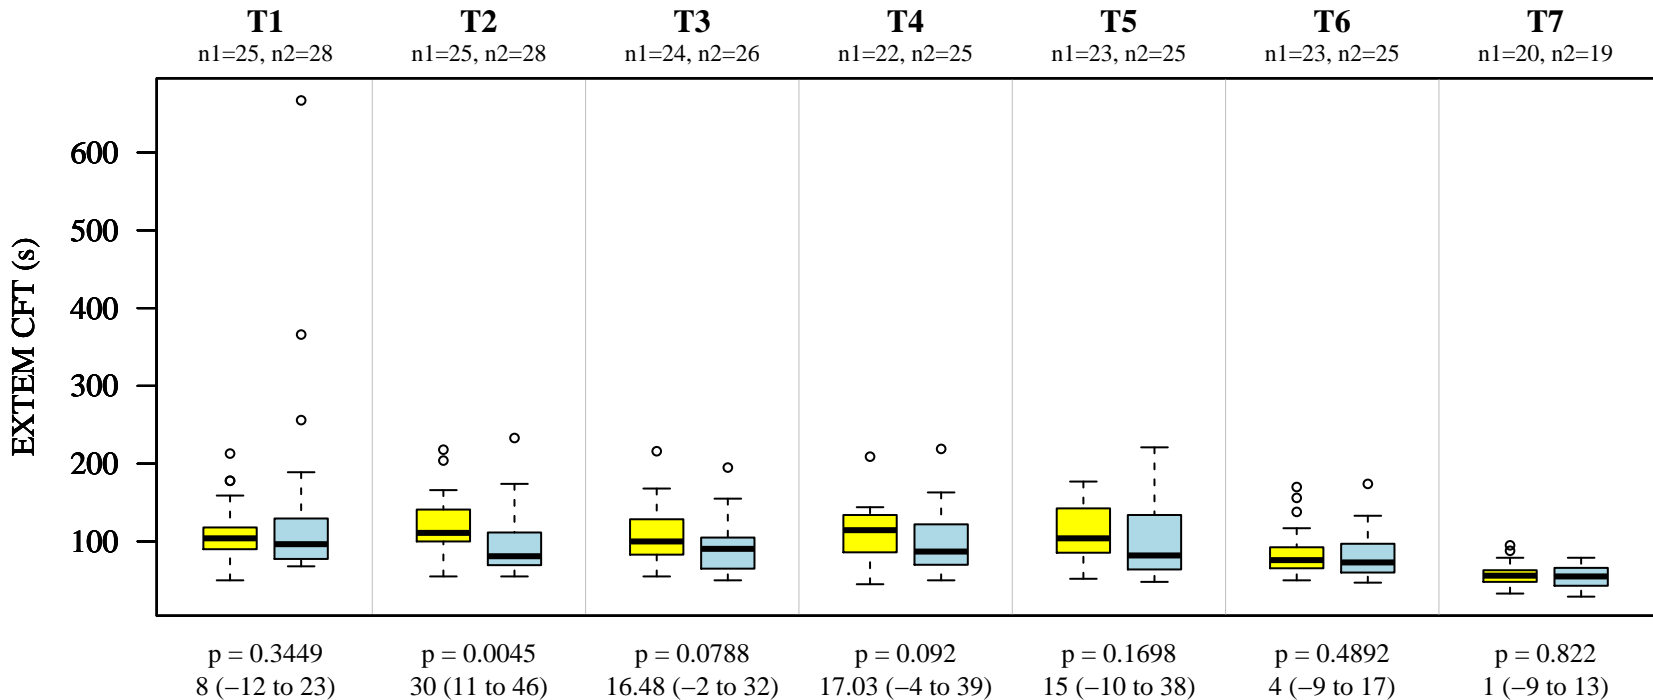



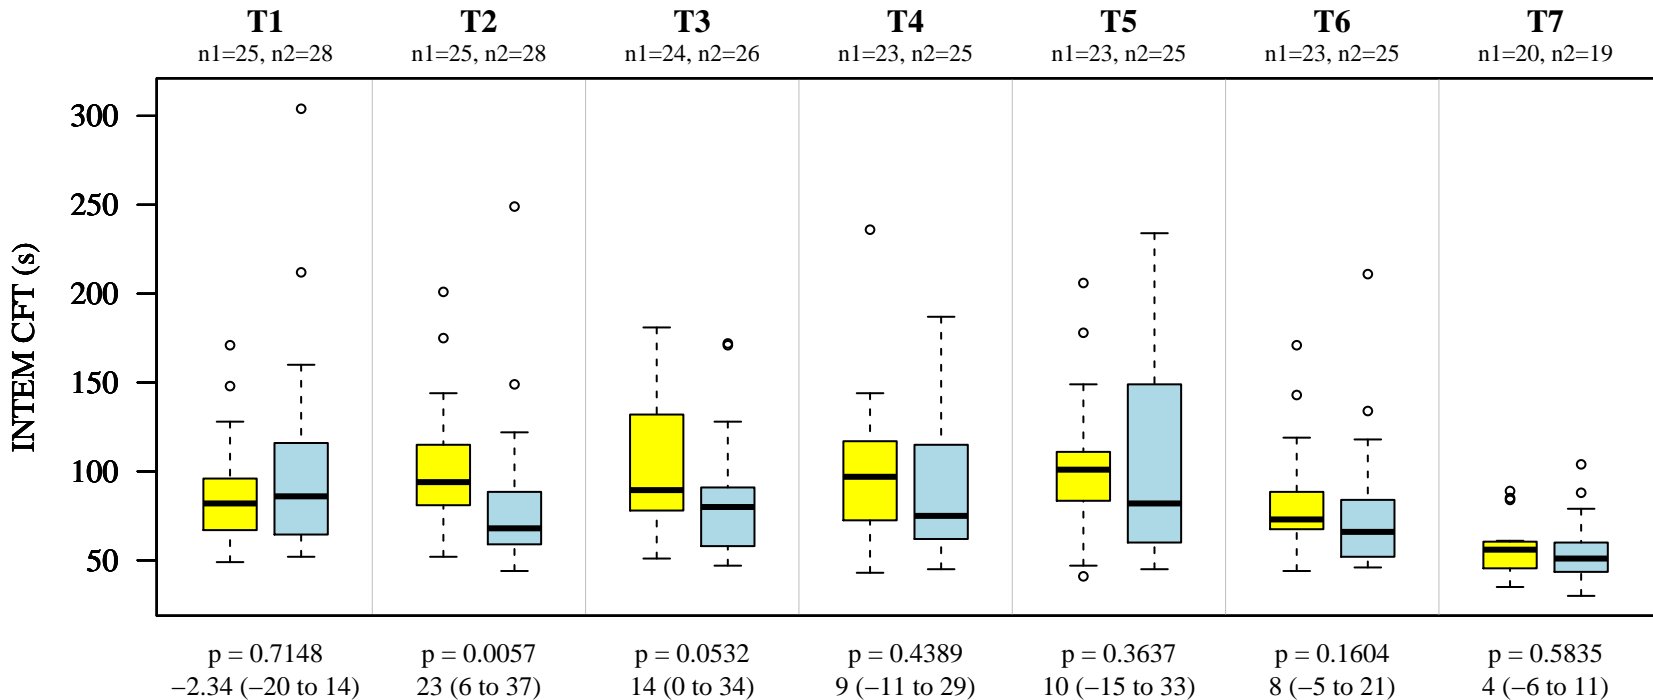

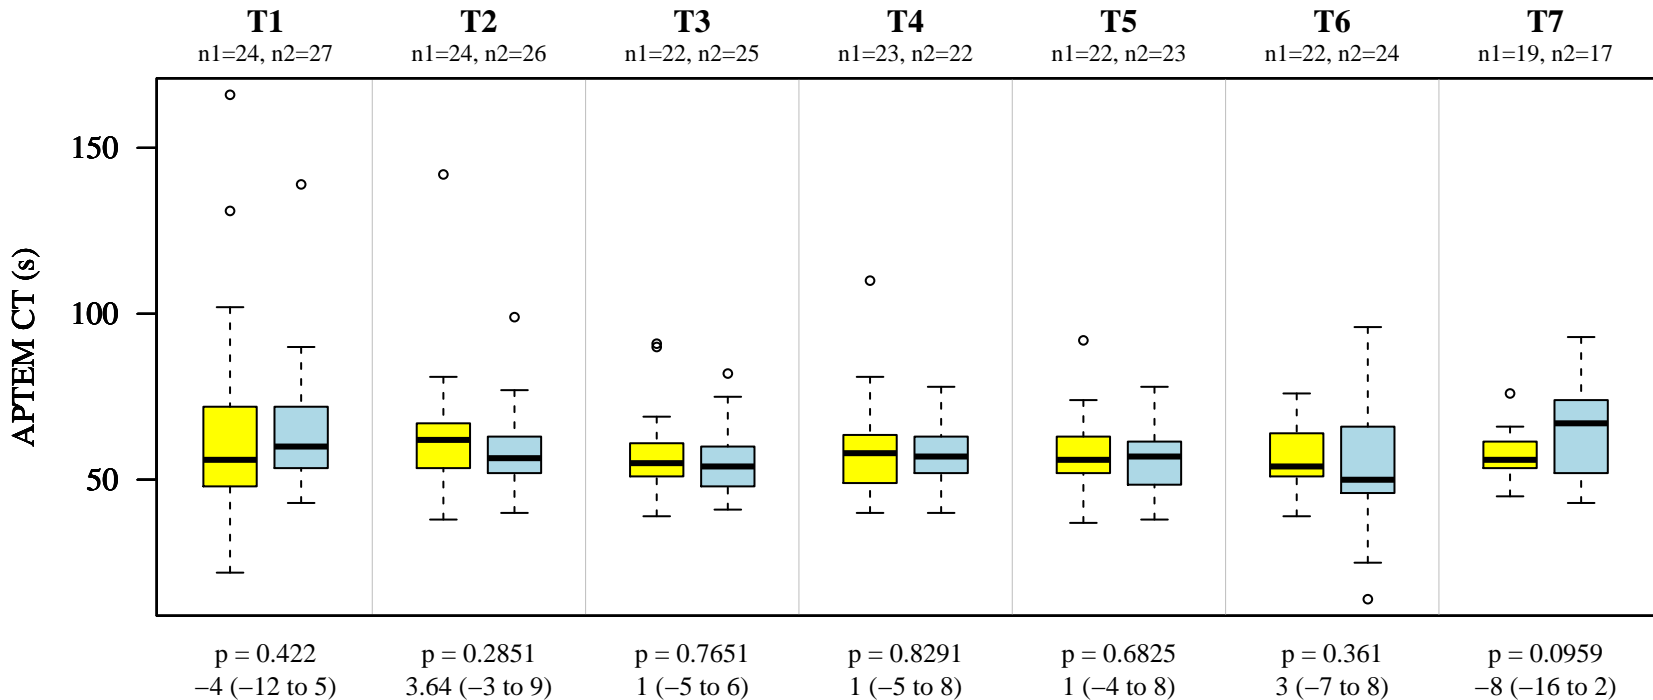

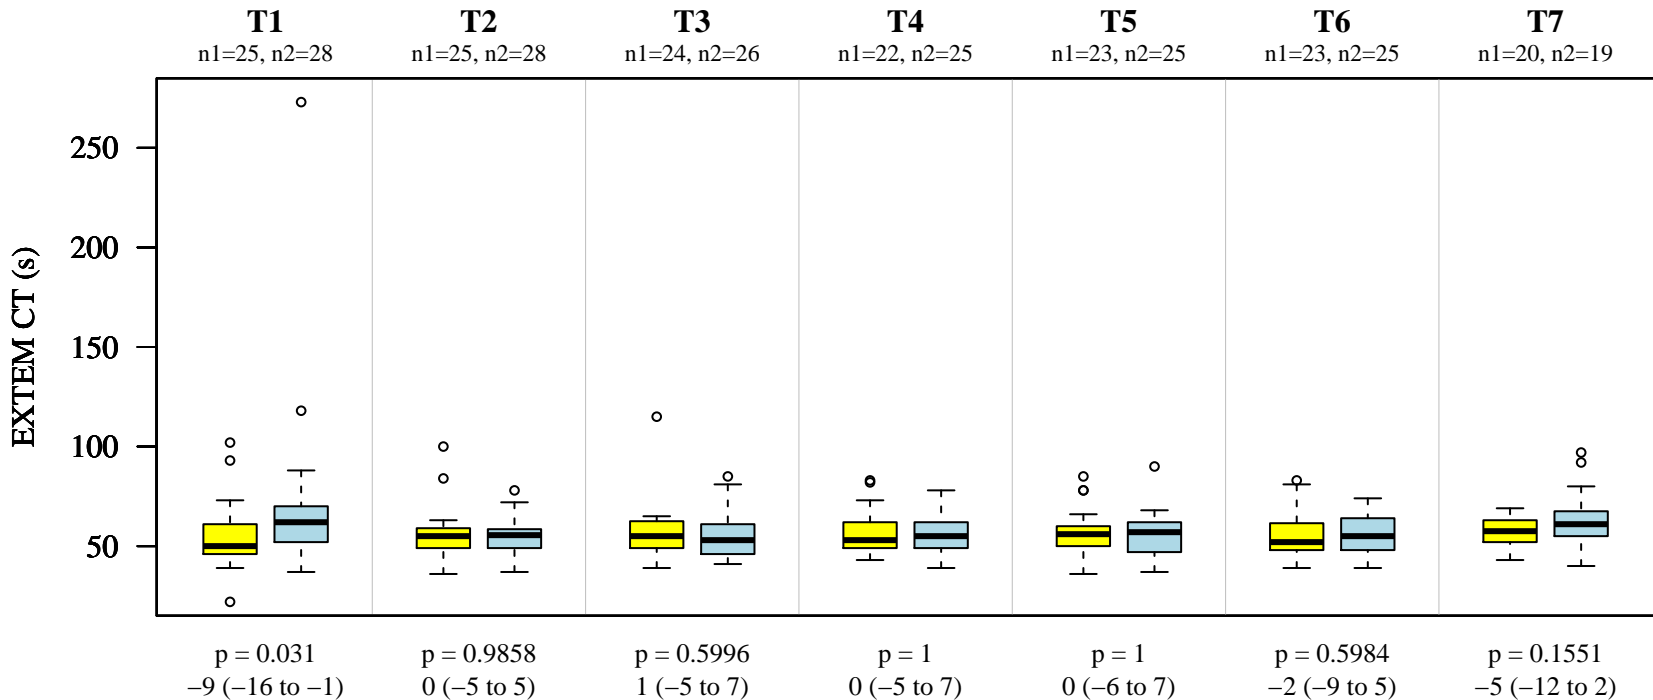

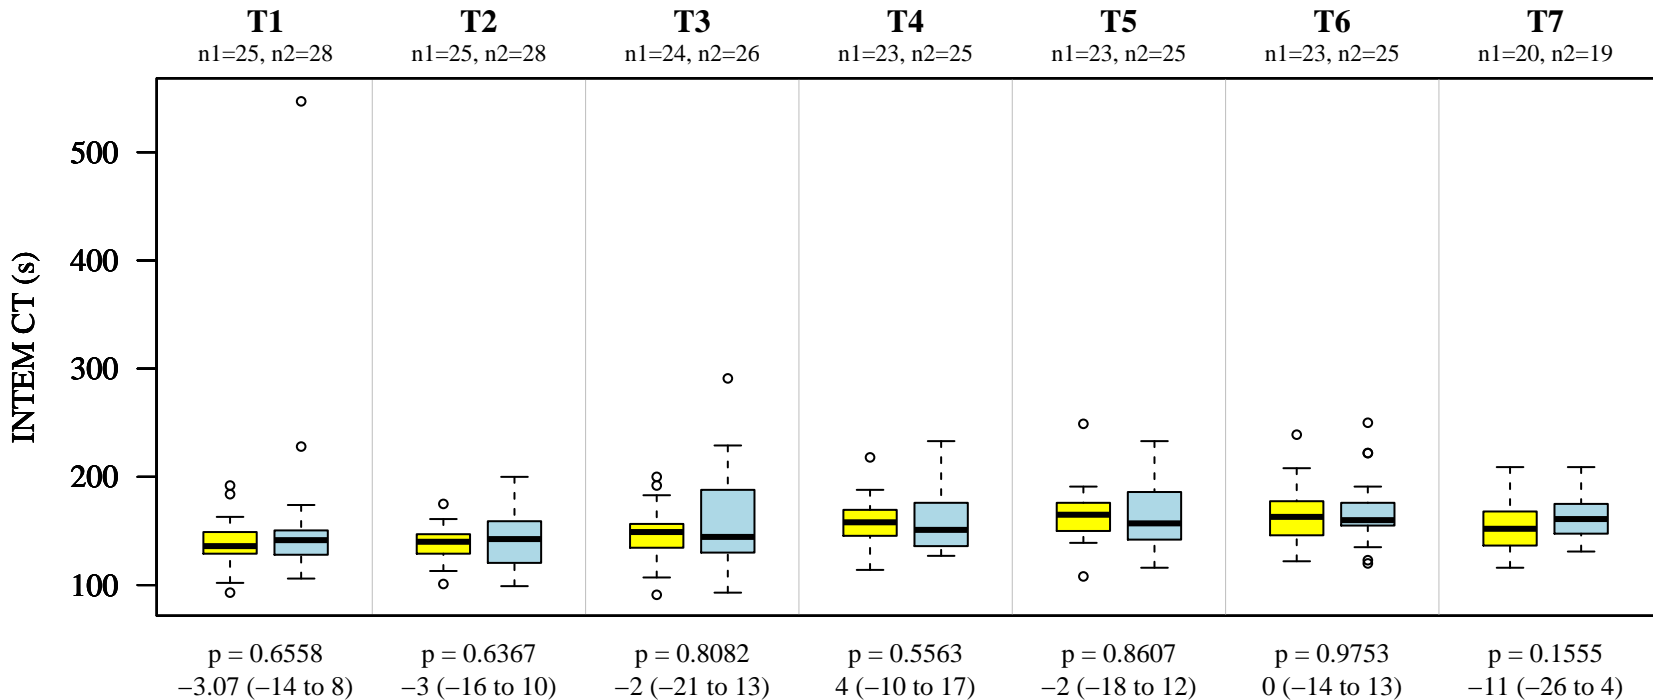

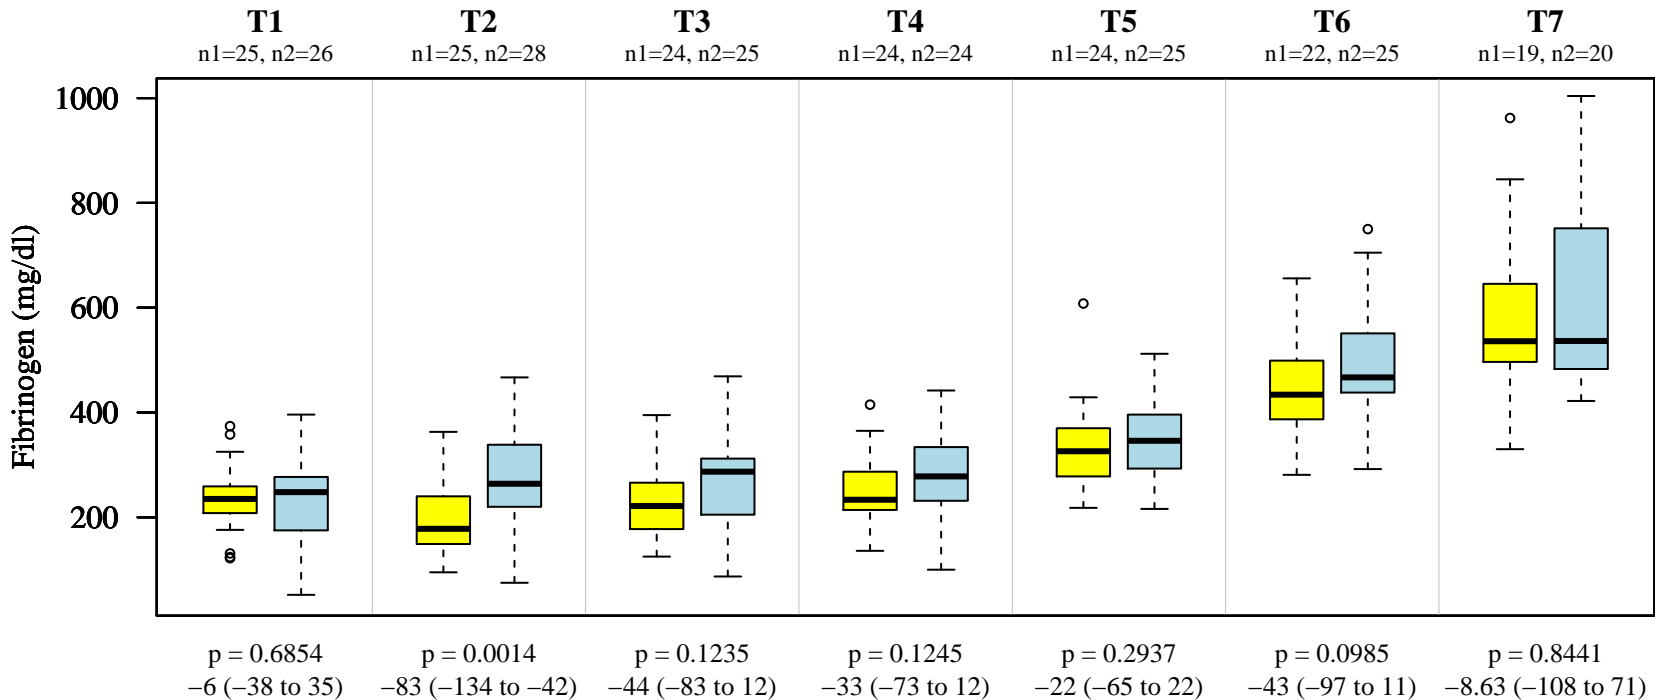

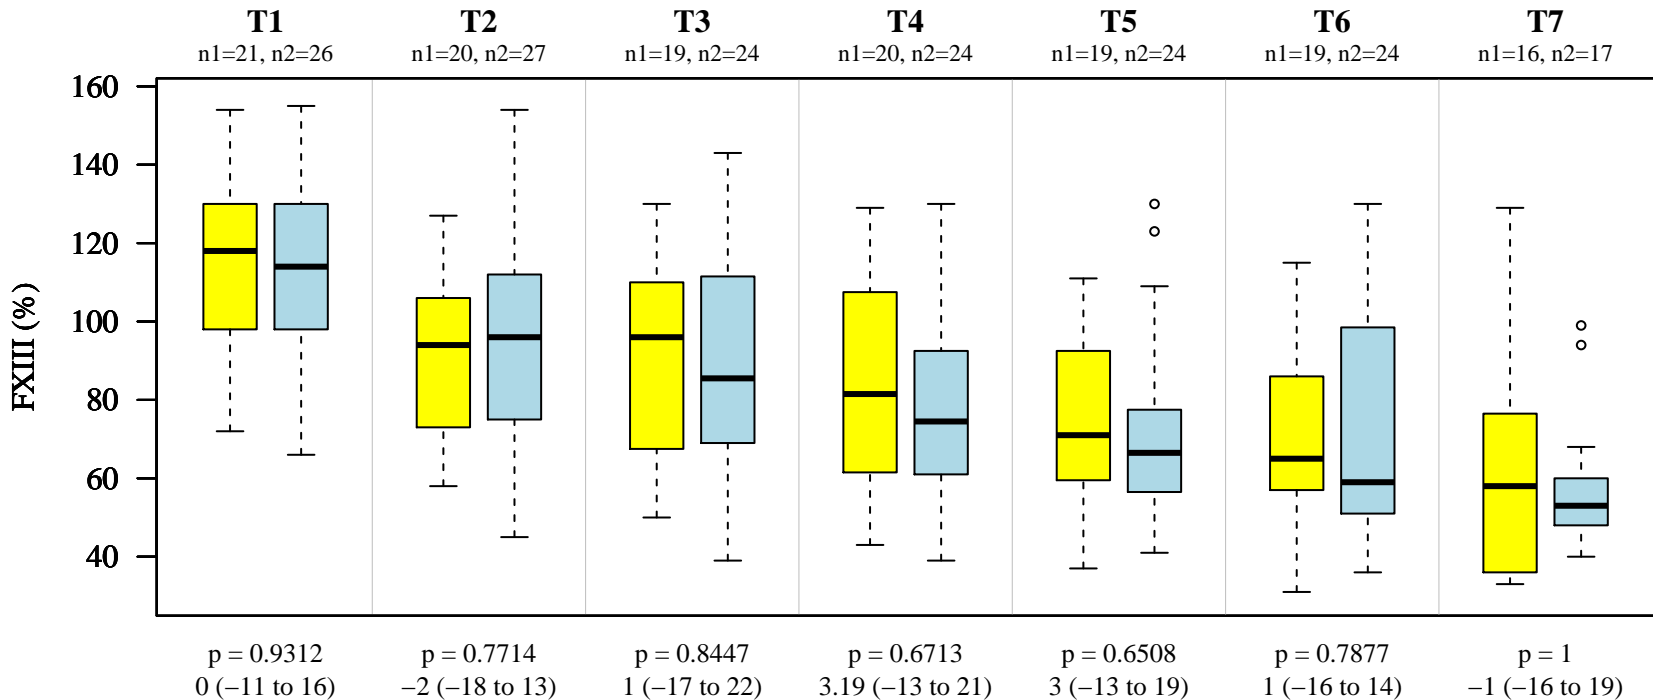

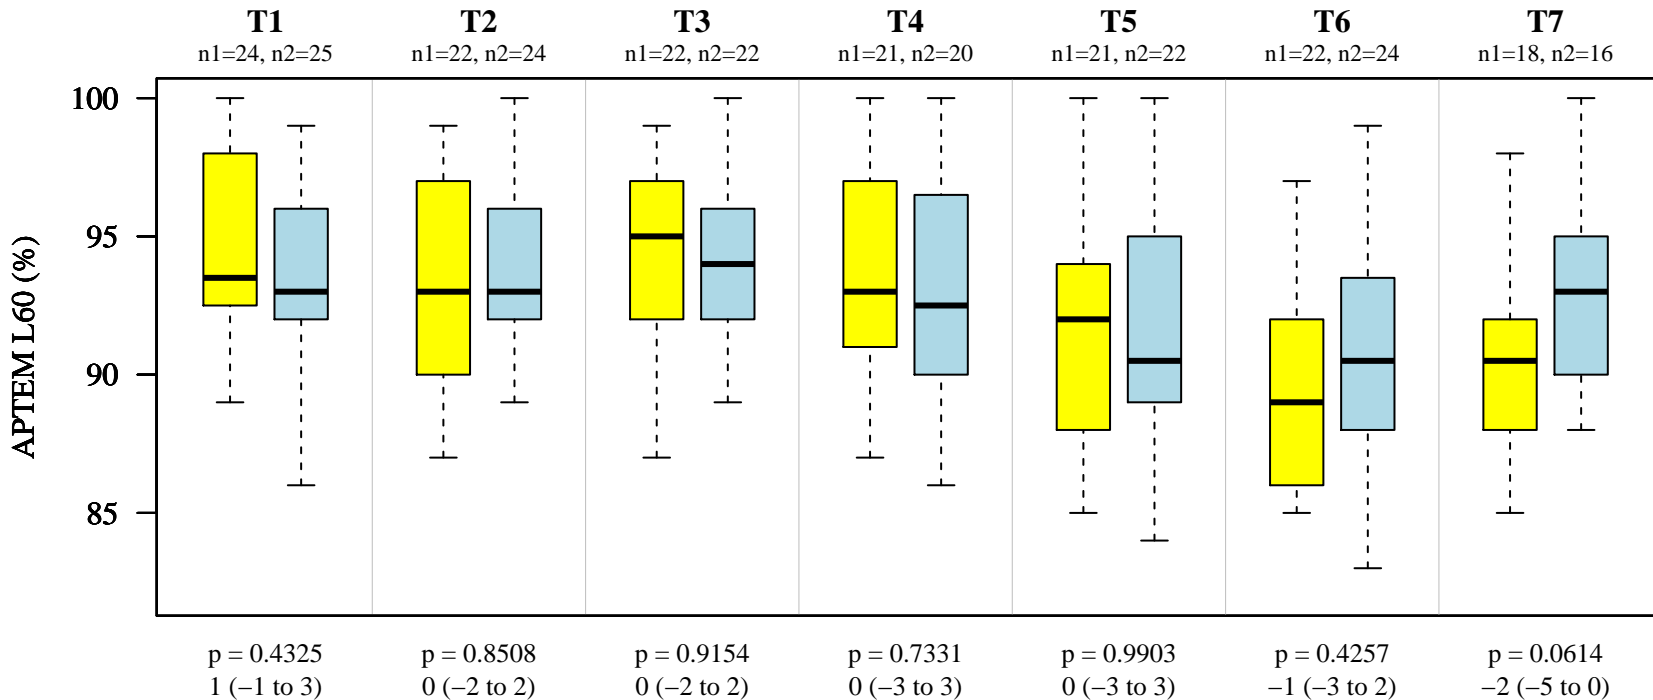

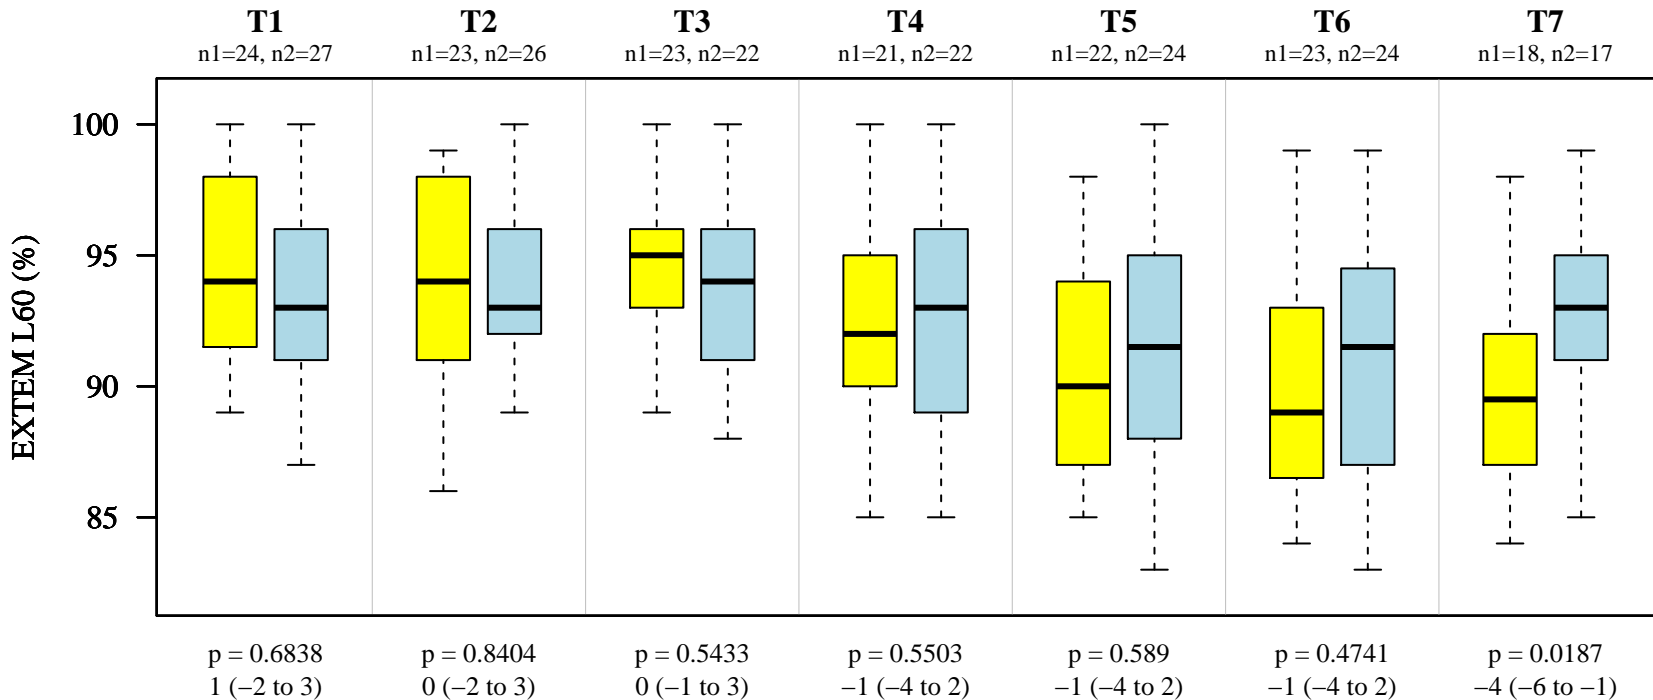



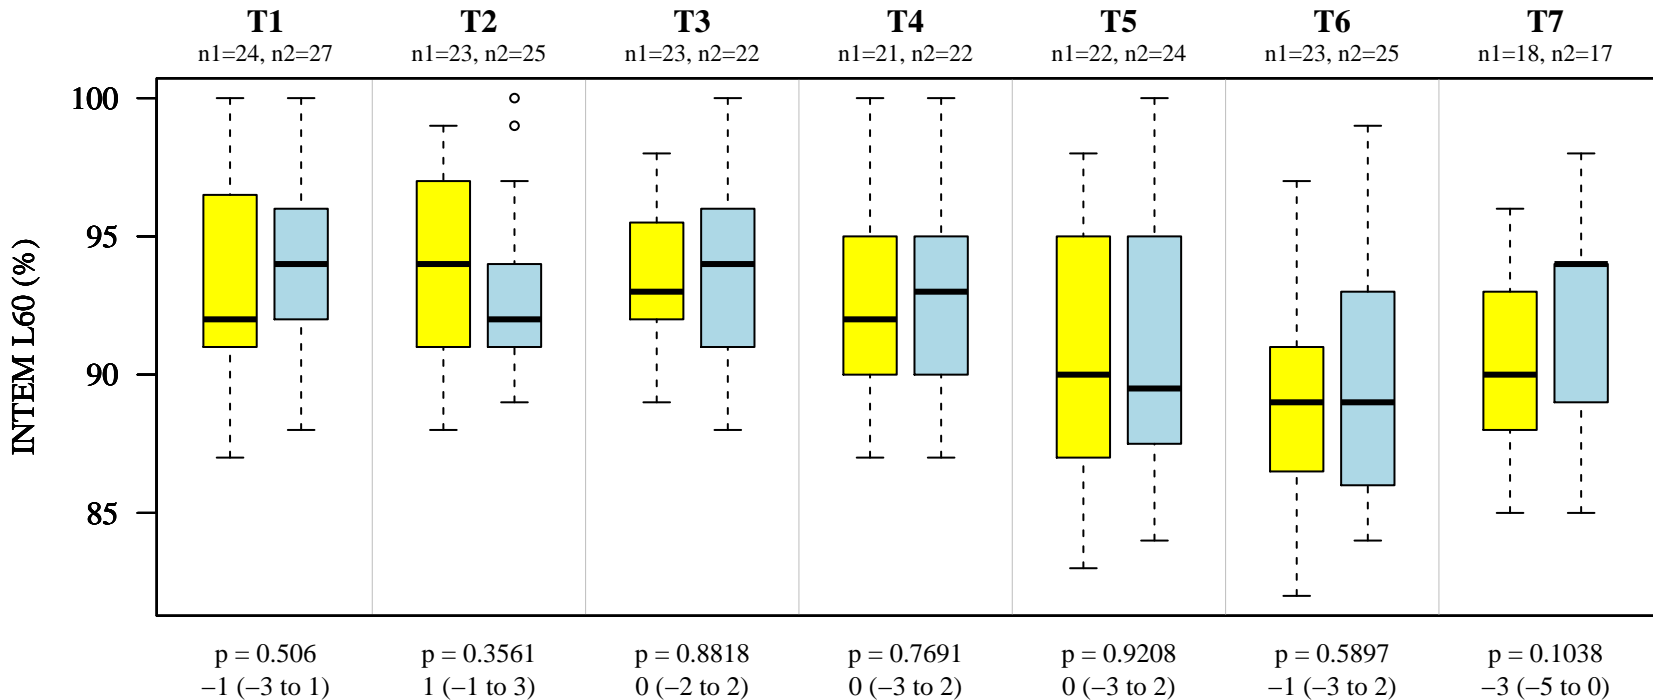

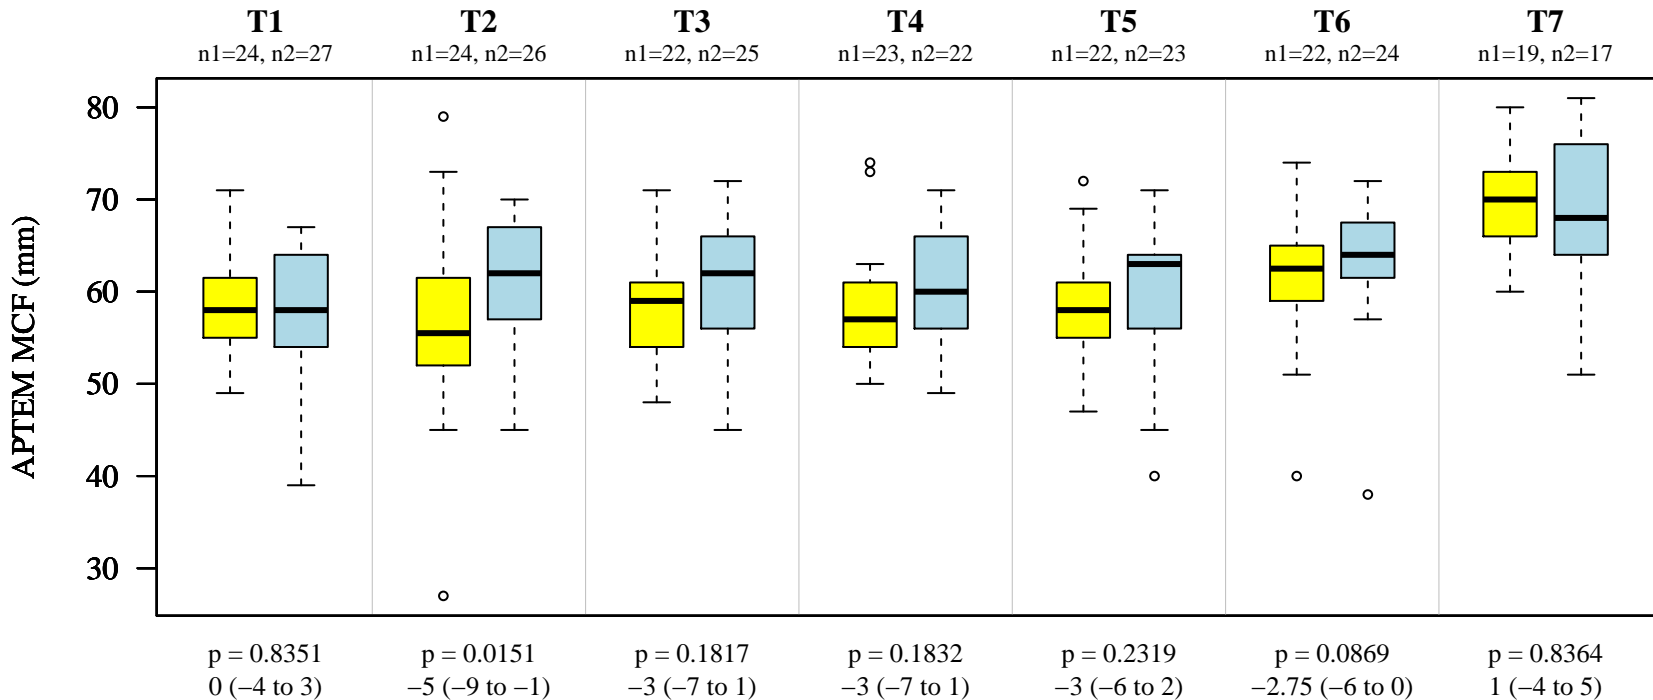

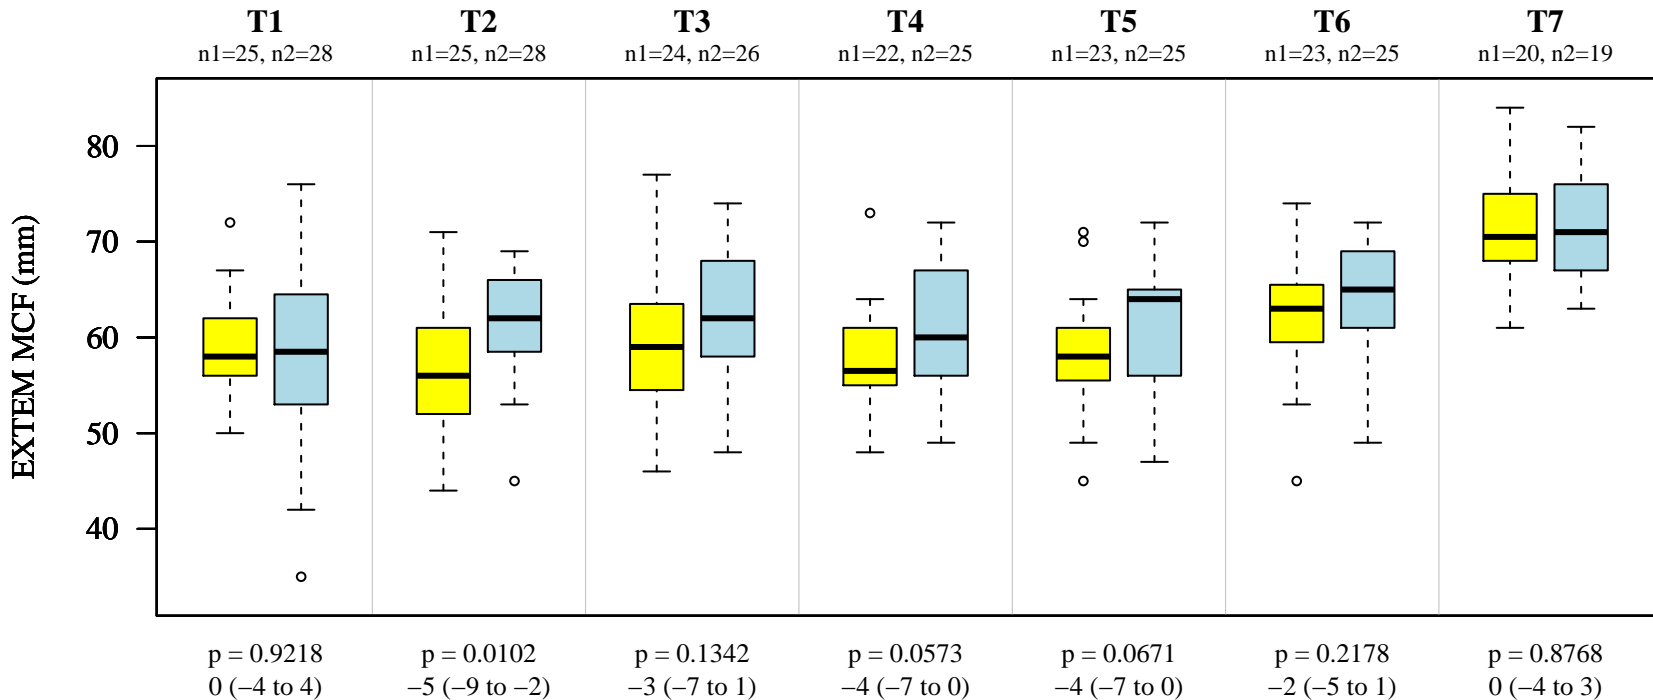

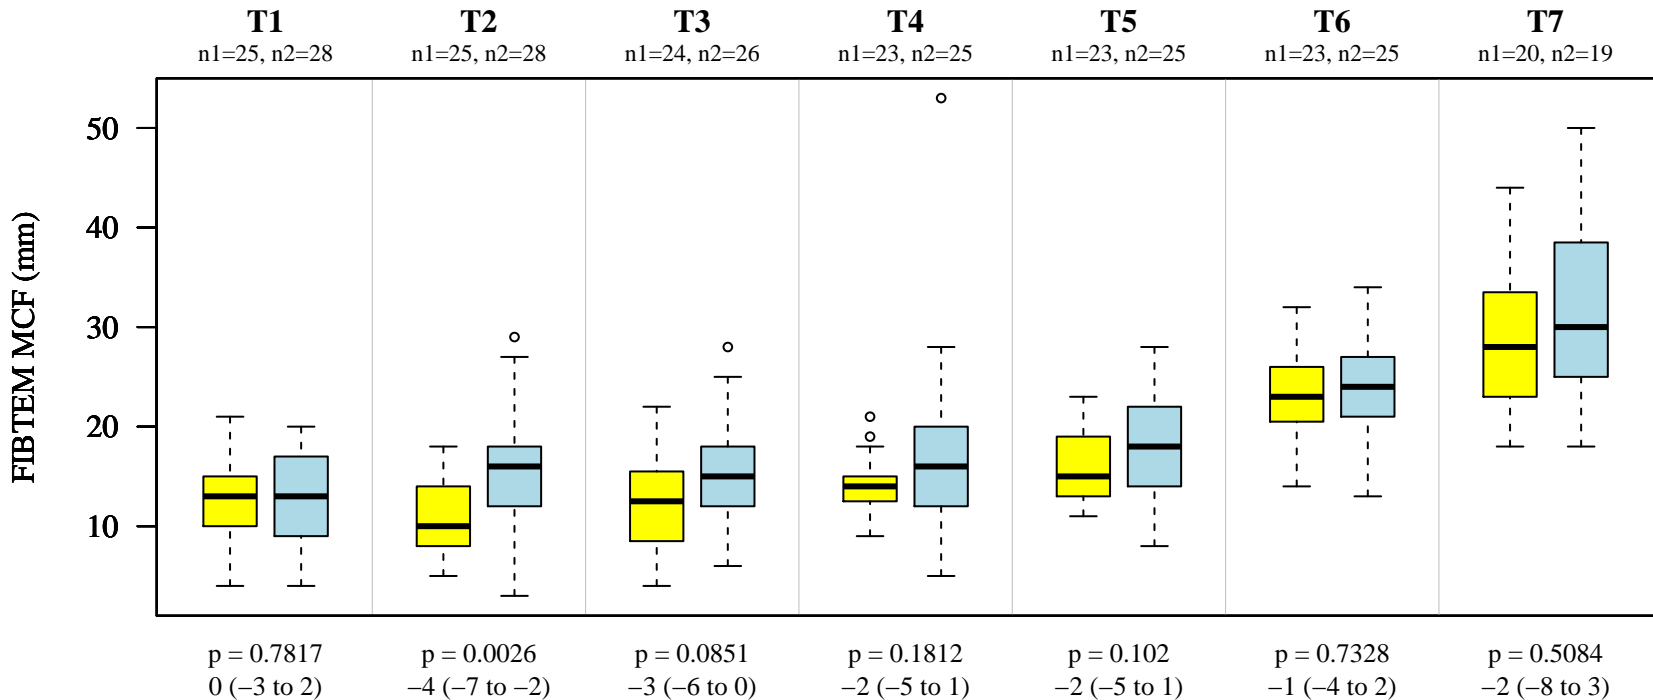

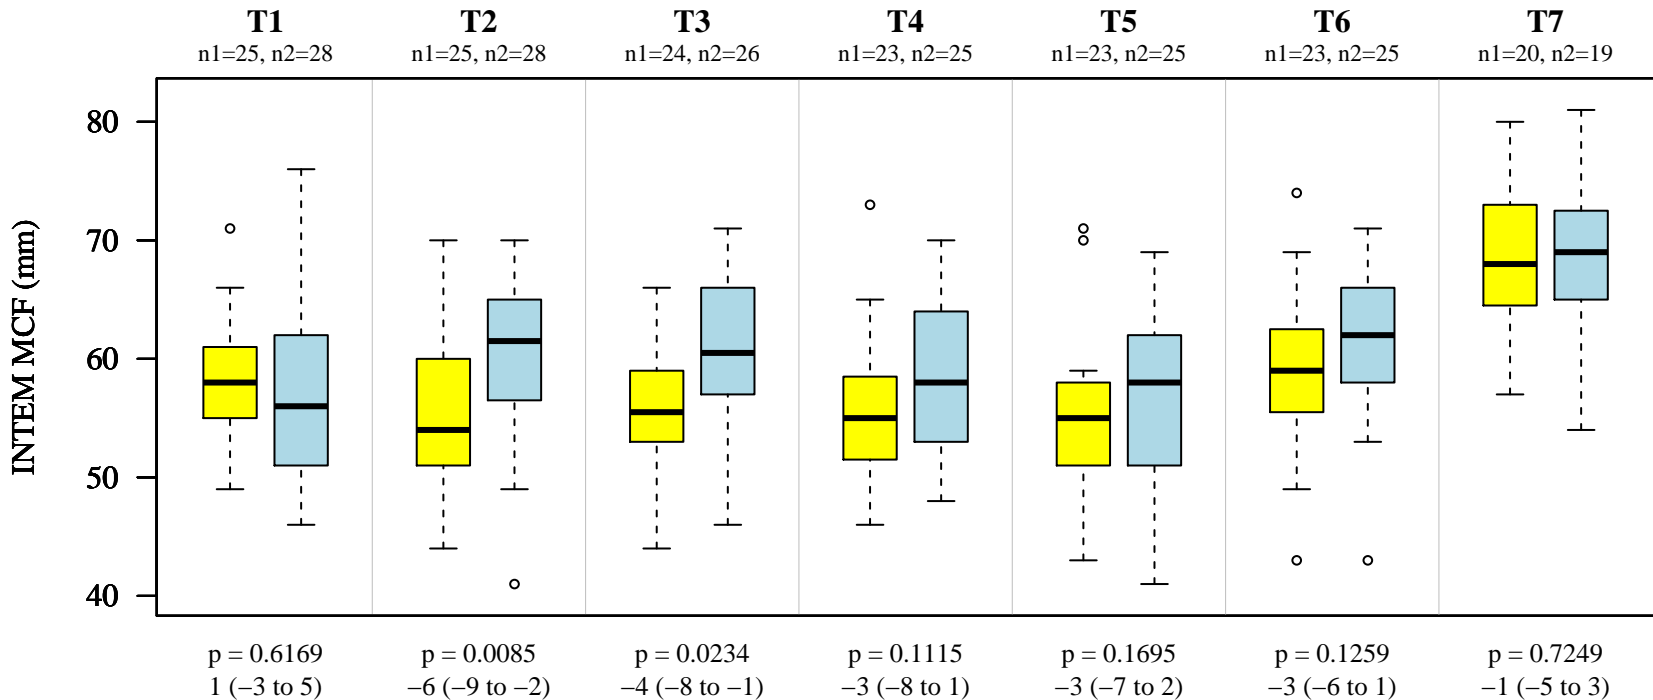

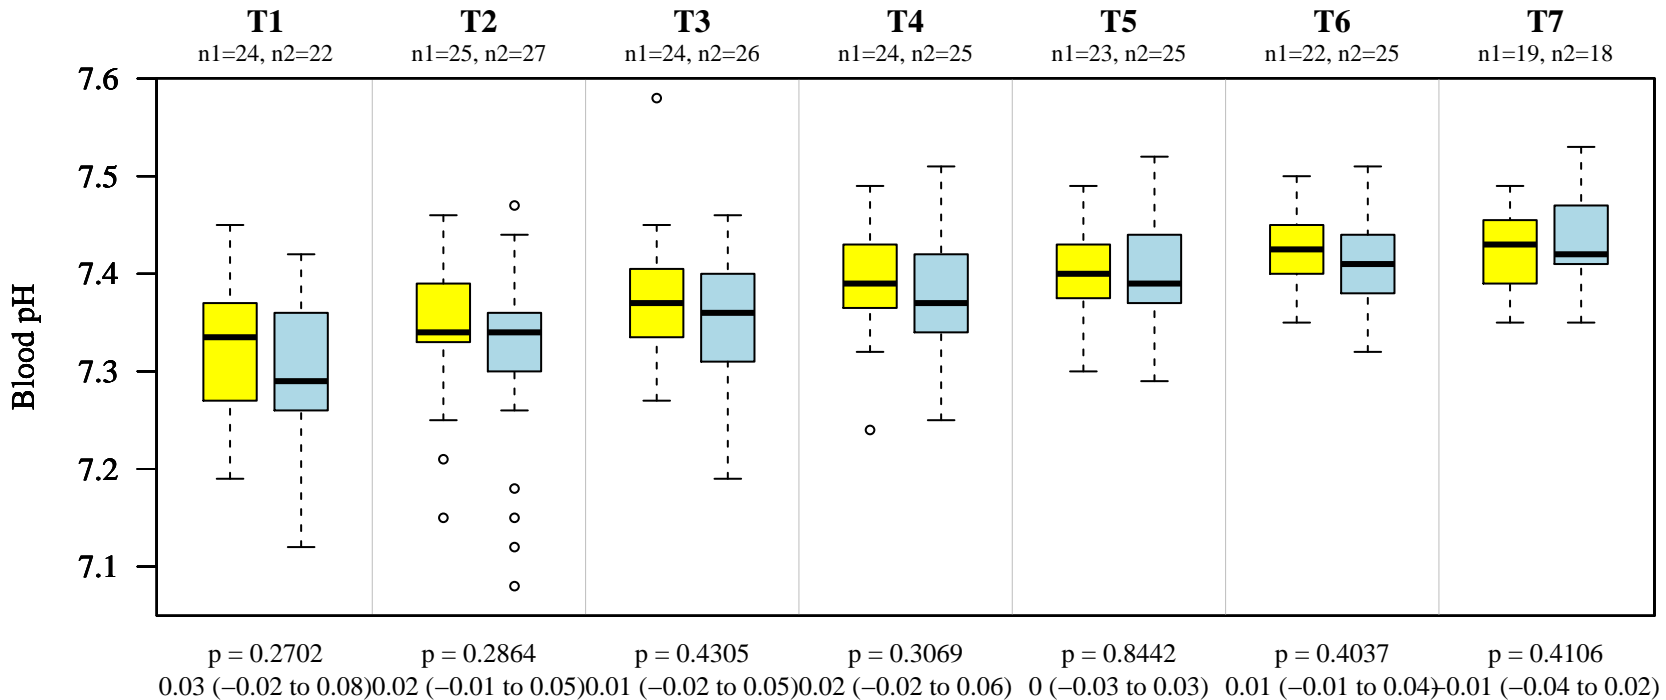

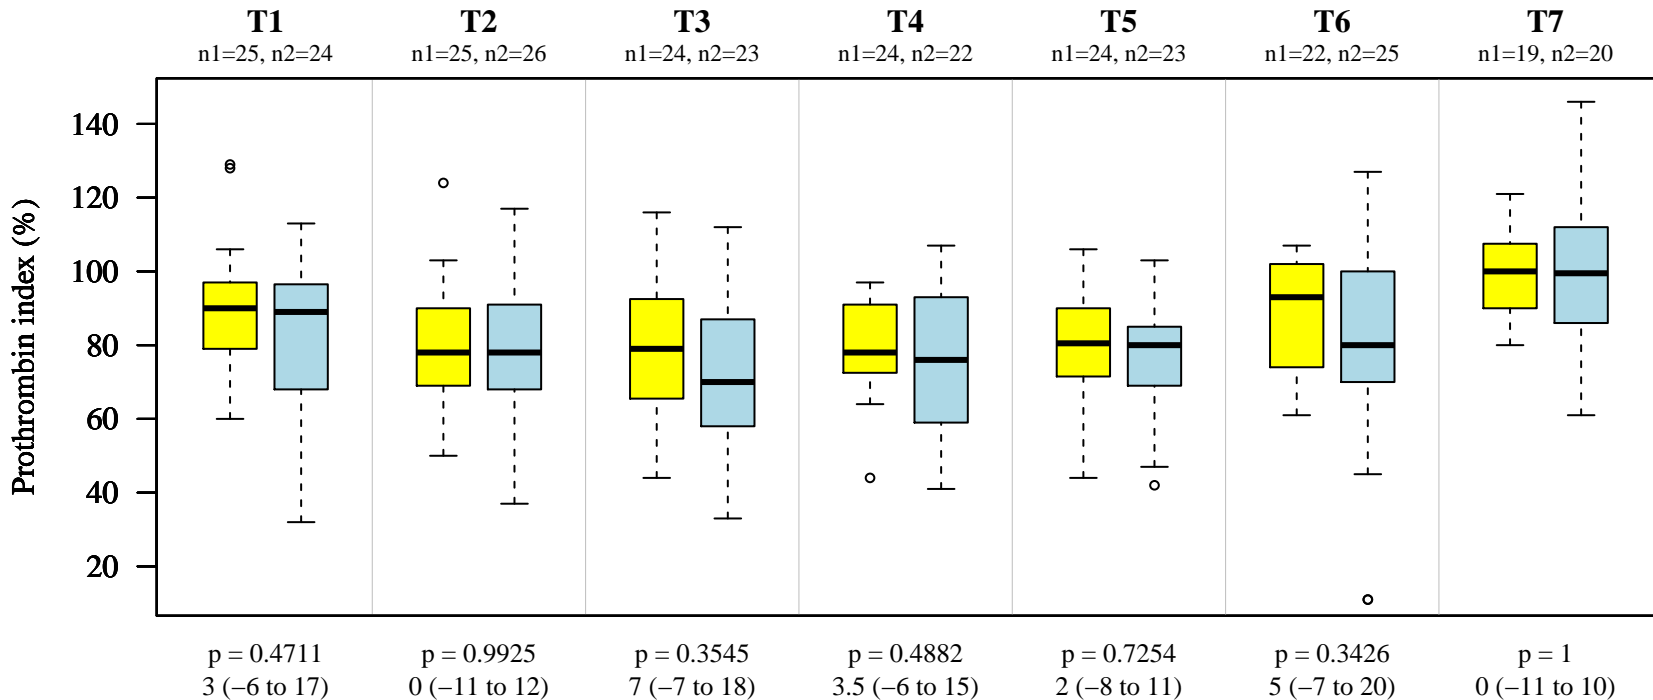

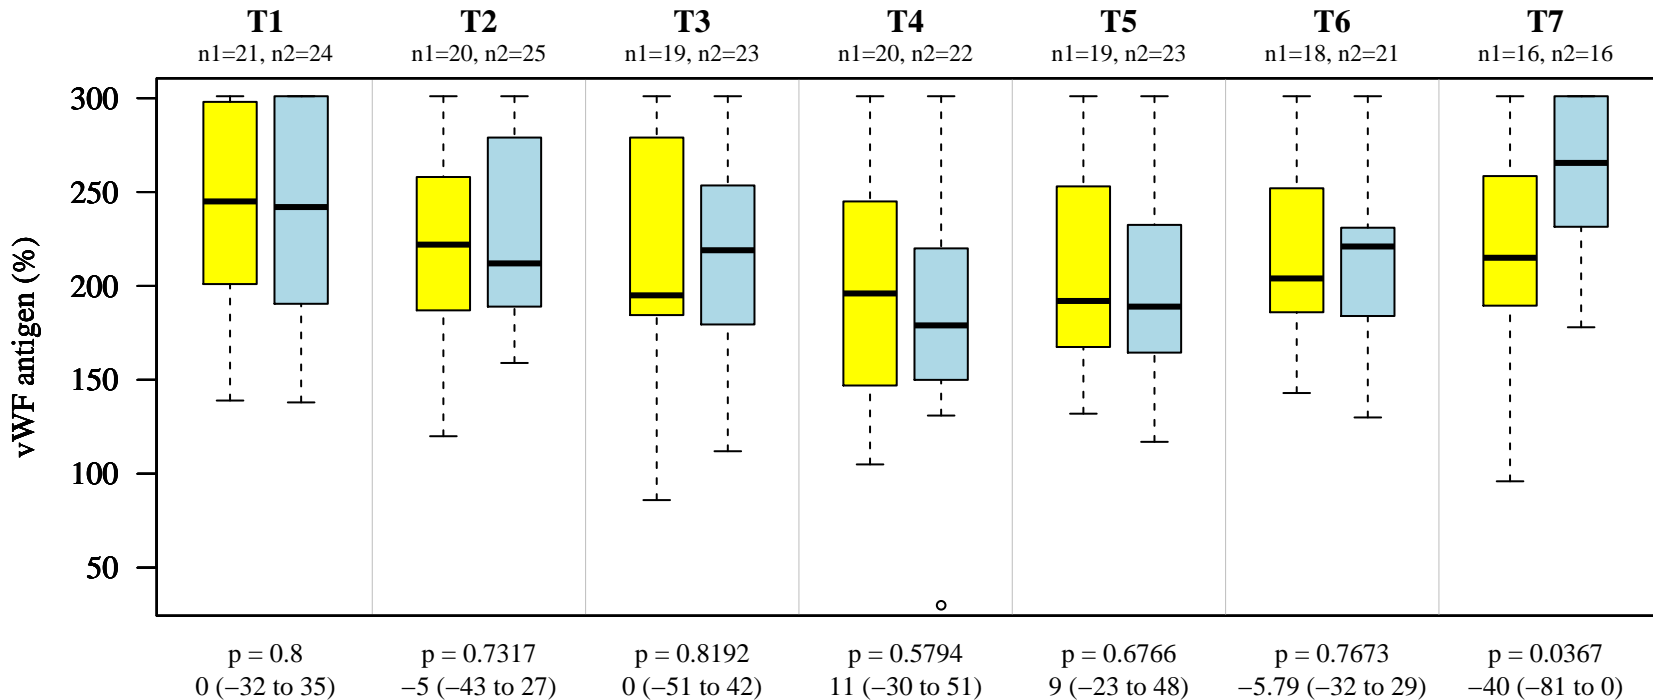



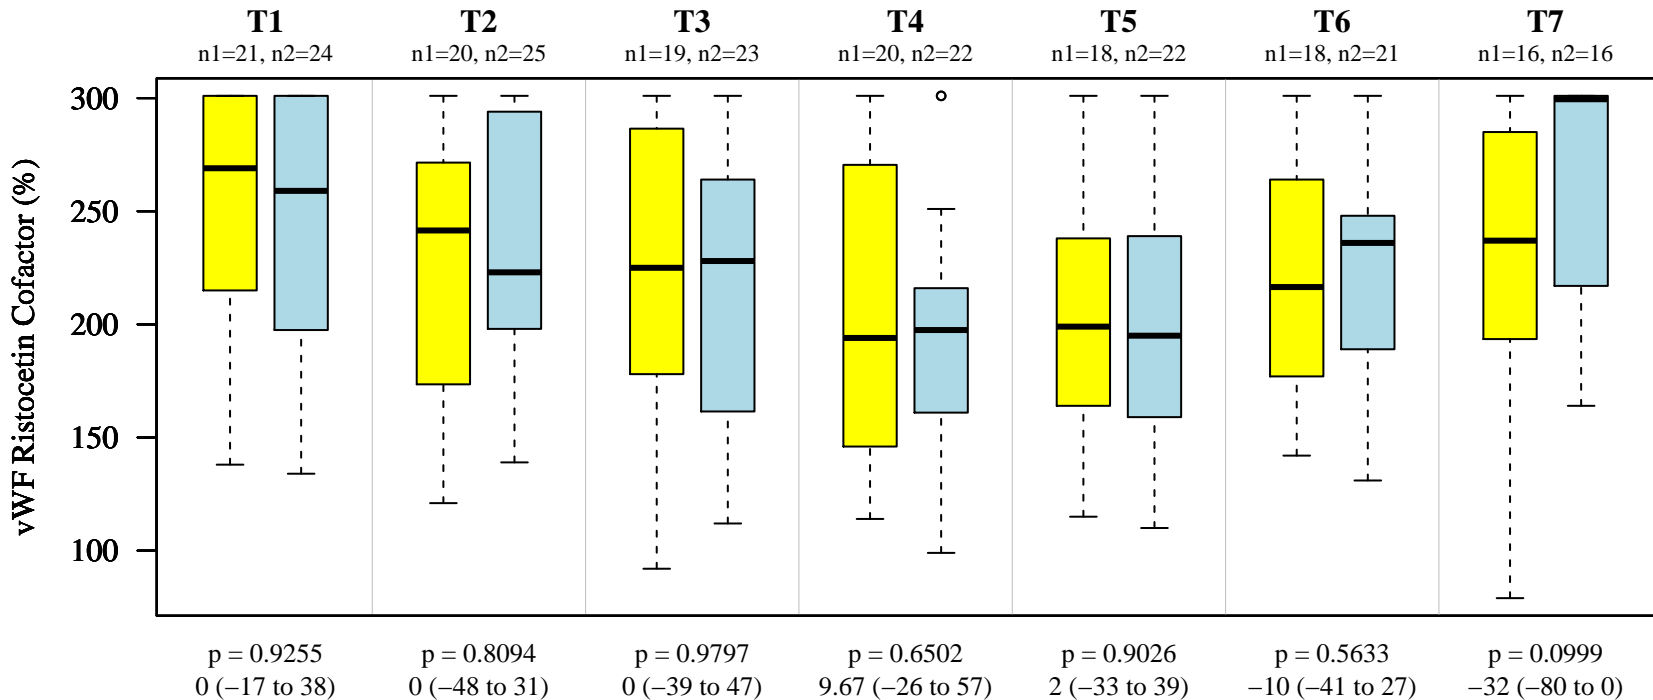

Supplement: ejanet-38-348-s004.pdf [file ejanet-38-348-s004.pdf]
